# Supplementary material
Source: PubMed Central journal article supplement (PMC6744994)
Supplement: NIHMS1048892-supplement-1.pdf [file NIHMS1048892-supplement-1.pdf]

|                                     | Experiment 1 |          |
|-------------------------------------|--------------|----------|
|                                     | <i>r</i>     | <i>p</i> |
| Trait anxiety                       | -0.137       | 0.433    |
| State anxiety pre-task              | -0.14        | 0.424    |
| State anxiety post-task             | -0.097       | 0.58     |
| Depressive symptoms                 | <0.001       | 0.998    |
| Behavioral inhibition system traits | 0.142        | 0.415    |
| Impulsiveness                       | -0.051       | 0.773    |

**Supplemental Table 1.** Correlation (Pearson's *r*) between individual differences in oculomotor capture (percent increase in fixations on the distractor vs. a non-target) between blocks and scores for the measures listed.
